1    **Subspecies and sexual craniofacial size and**  
2    **shape variations in Japanese macaques**  
3    **(*Macaca fuscata*)**

4

5    Wataru Yano<sup>1</sup>, Naoko Egi<sup>2</sup>, Tomo Takano<sup>3</sup>, and Naomichi Ogihara<sup>4</sup>

6    <sup>1</sup>*Department of Oral Anatomy, Asahi University School of Dentistry, 501-0296,*  
7    *Japan*

8    <sup>2</sup>*Primate Research Institute, Kyoto University, Inuyama 484-8506, Japan*

9    <sup>3</sup>*Japan Monkey Centre, Inuyama 484-0081, Japan*

10   <sup>4</sup>*Department of Mechanical Engineering, Faculty of Science and Technology,*  
11   *Keio University, Yokohama 223-8522, Japan*

12

13   Corresponding Author: Email: [wataru.yano@gmail.com](mailto:wataru.yano@gmail.com)

14

15   **Running-in Heading: Craniofacial variations in *Macaca fuscata***

16   *Key words: Three-dimensional morphometrics, Cranial shape, Island, Subspecies,*  
17   *Sexual dimorphism,*

18 **Abstract**

19 In order to investigate craniofacial size and three-dimensional shape variations  
20 independently in the Japanese macaque (*Macaca fuscata*) we used a geometric  
21 morphometrics technique. A total of 55 specimens were CT scanned to generate a  
22 three-dimensional model of each cranium, and 57 landmarks were digitized to  
23 analyze the craniofacial shape variation in the Japanese macaque. The results  
24 showed that four intra-specific groups, consisting of two subspecies and the two  
25 sexes, differed in both size and shape space. In size, the cranium of the *Macaca*  
26 *fuscata yakui* (MFY) was smaller than that of *Macaca fuscata fuscata* (MFF) in  
27 both sexes, and female crania were smaller than male crania in both subspecies.  
28 Shape sexual dimorphisms in both subspecies were detected in the first axis of  
29 principal component analysis and were related to a relatively broad orbit, smaller  
30 neurocranium, enlarged snout, and broader temporal fossa in males. The shape  
31 differences between subspecies showed different features than those between  
32 sexes. Male subspecies shape differences were detected in the first and third axes,  
33 while those for females were in the first and second axes. Subspecies shape  
34 differences common to both sexes were a narrower orbit, relatively small  
35 neurocranium, longer snout, and postorbital constriction in MFY. Male MFY was  
36 specifically characterized by a more anterior and superior direction of snout  
37 protrusion. In contrast, female MFY showed an inferior direction of snout  
38 protrusion. Female MFY also had a taller orbit. With regard to the relationship  
39 between size and shape differences, shape sexual dimorphism for each subspecies  
40 was positively associated with size difference, but there was no such association  
41 between subspecies in either sex. Size does not seem to play an important role in  
42 subspeciation of *Macaca fuscata*.

43 **Introduction**

44           The Japanese macaque (*Macaca fuscata*) ranges in the northern-most area  
45 in extant non-human primates, and inhabits the Japanese archipelago. Kuroda  
46 (1940) firstly distinguished the population in Yakushima Island from other  
47 populations based on its dwarfed body size and diagnostic pelage color and  
48 proposed the subspecies status of *Macaca fuscata yakui* (MFY) as distinct from  
49 other populations of *Macaca fuscata fuscata* (MFF). According to Nozawa et al.  
50 (1977), gene flow from the mainland of Japanese archipelago to Yakushima Island  
51 after the Marine Isotope Stages (MIS) 6–8 (0.13–0.30 Ma) should have been very  
52 rare or unlikely. Evidence from mtDNA data demonstrated that female monkeys  
53 did not migrate to Yakushima Island after 178 kya (Hayaishi and Kawamoto,  
54 2006).

55           Cranial form differences between MFY and MFF have been diagnosed by  
56 using linear distance based morphometrics (craniometry: Ikeda and Watanabe,  
57 1966; Mouri and Nishimura 2002; somatometry: Iwamoto, 1971, Hamada et al.,  
58 1996). According to those studies, regarding size variation, MFY crania are  
59 generally smaller than MFF crania. Regarding shape, Ikeda and Watanabe (1966)  
60 also pointed out that MFY has expanded zygoma, postorbital constriction, higher  
61 lambda and inion, narrower orbit, and protrusive snout, based on index comparison.  
62 Iwamoto (1971) also noted a significantly larger relative head modulus in MFY,  
63 possibly due to higher lambda, and lower cephalic index in MFY, possibly due to  
64 posteriorly positioned glabella in MFY. These conventional osteometric studies,  
65 however, leave some unanswered questions about defining statistically  
66 independent size and shape metrics. To more rigorously explore subspecies shape  
67 variations that are mathematically independent from size, we employed landmark-  
68 based three dimensional geometric morphometrics (GM). GM enables  
69 independent definitions of size and shape, and graphical presentation of the results

70 because it preserves geometric relationships among landmarks. (Zelditch et al.,  
71 2004; Slice, 2005). The usefulness of this method has been tested in inter- and  
72 intraspecific primates size and shape analyses (e.g. O'Higgins and Dryden 1993;  
73 Frost et al., 2003; Pan et al., 2003; Schaefer et al., 2004; Cardini et al., 2008a,b).  
74 The aim of our study was to test whether or not four intraspecific groups of  
75 Japanese macaque consisting of two subspecies and the two sexes differ in their  
76 cranial morphology in size and shape.

77

## 78 **Methods**

79 A total of 55 adult dried crania of Japanese macaque (14 Male MFFs, 13  
80 Female MFFs, 14 Male MFYs, and 14 Female MFYs) were obtained from the  
81 Laboratory of Physical Anthropology, Kyoto University (Kyoto, Japan), Primate  
82 Research Institute, Kyoto University (Inuyama, Japan), and Japan Monkey Centre  
83 (Inuyama, Japan: JMC). We used adult specimens whose upper third molars were  
84 fully erupted. We did not consider the differences between wild and captive  
85 specimens for any of the four groups. MFF specimens were taken from various  
86 sites in the mainland of the Japanese archipelago. The origins of MFY specimens  
87 were from the wild Yakushima Island population and the captive population in  
88 JMC.

89 Each specimen was scanned with a helical computed tomography (CT)  
90 scanner (TSX-002A/4I, Toshiba Medical Systems, Tokyo, Japan) at the  
91 Laboratory of Physical Anthropology, Kyoto University. Tube voltage and current  
92 were set at 120 kV and 100 mA. Cross-sectional images were reconstructed with a  
93 pixel size of 0.20 to 0.25 mm and slice interval of 0.20 mm. The 3D surface of the  
94 cranium was then generated using a triangular mesh model with commercial  
95 software (Analyze 6.0, Mayo Clinic, Rochester, MN, USA).

96           We digitized a total of 57 landmarks (Fig. 1, Table 1) on the external  
97 and internal surfaces of each cranium using commercial software (Rapidform  
98 2004, INUS Technology, Seoul, Korea). All the crania were measured by the same  
99 person (WY). As shape variances due to left-right asymmetry were not considered  
100 here, we symmetrized the positions of all landmarks using self-symmetrization  
101 (Zollikofer and Ponce de Leon, 2002). Specifically, we created the horizontally  
102 reflected specimen for each sample and superimposed them by least-square  
103 superposition to calculate the mean of each landmark coordinate, yielding the  
104 symmetrized specimen of the original. Then we analyzed the variances in the  
105 landmark positions using the geometric morphometric software Morphologika  
106 version 2.3.1 (O'Higgins and Jones, 2006). In this method, a set of landmark  
107 coordinates of each cranium were firstly scaled by centroid size (CS). CS is the  
108 square root of the sum of squared Euclidian distances from each landmark to the  
109 mean of the configuration of landmark coordinates. Subsequently, normalized  
110 landmark coordinates for each specimen were registered using the Generalized  
111 Procrustes Analysis (GPA). Thus, the landmark configuration of each cranium was  
112 represented by a single point in Kendall's shape space. The points were projected  
113 onto a linear tangent space for subsequent statistical analyses. Principal  
114 Component Analysis (PCA) was conducted to extract principal components (PCs)  
115 of shape variations among crania (O'Higgins and Jones, 1998). Within this shape  
116 space, the relative positions of the means of the four intraspecific groups were  
117 compared. Using the software, the shape differences along the principal axes  
118 could also be visualized using 3D deformation of the wireframe connecting the  
119 landmarks.

120           The deviation from the normal distribution of CS and PC scores for each  
121 group was tested with the Shapiro Wilk test. If the normality test was passed

122 Analysis of variance (ANOVA) tests and post-hoc Tukey's HSD tests were  
123 employed to test for significant differences in CS and the PC scores among the  
124 four intraspecific groups. These statistical tests were performed using Statistica  
125 2000 version 5.5 (StatSoft, Tulsa, OK, USA).

126

## 127 **Results**

128 The proportions of eigenvalues of PCA are listed in Table 2.  
129 Approximately 80% of the variance was incorporated in the first fifteen PCs.  
130 Significance differences among the four intraspecific groups were found for PC1,  
131 PC2, PC3 with the ANOVA test. Other axes were not explored in this study.  
132 Proportion of eigenvalue of PC1 accounted for 20.0% of the total variance, PC2  
133 for 11.7%., and PC3 for 9.36%. The normality test for each scores (CS, PC1, PC2,  
134 PC3) for each groups was passed demonstrating no significant deviation from  
135 normal distribution.

136 The four intraspecific groups clearly differed from one another in size  
137 variation represented by CS (Fig.2). The ANOVA test showed that mean scores of  
138 CS for the four intraspecific groups were not homogeneous ( $p < 0.001$ ), and  
139 subsequent post hoc Tukey's HSD test revealed that males had larger CS than  
140 female for both subspecies ( $p < 0.001$ ), and likewise, MFF were larger than MFY  
141 for both sexes ( $p < 0.01$ ) (Fig.3A).

142 The shape variations are illustrated as scatter plots of PC1 versus PC2,  
143 and PC1 versus PC3, in Figure 4. Along the PC1 axis, males clearly had higher  
144 scores than females for both subspecies. Likewise, MFY had slightly higher PC1  
145 scores than MFF for both sexes. The ANOVA test demonstrated that mean PC1  
146 scores for the four groups were not the same ( $p < 0.001$ ). Tukey's HSD test  
147 revealed that males had higher scores than females for both subspecies ( $p < 0.001$ ),

148 and MFY had higher scores than MFF for both sexes ( $p < 0.05$ ) (Fig.3B). Besides,  
149 ANOVA also showed that mean scores for both PC2 and PC3 were not equal  
150 among the four groups ( $p < 0.001$ ). Tukey's HSD test indicated that the PC2 score  
151 for MFY females was lower than that for MFF males and MFF females ( $p < 0.01$ )  
152 and the PC3 score for MFY males was lower than that for MFF males ( $p < 0.05$ )  
153 (Fig.3C, D).

154         Figures 5-7 are visual presentations of 3D shape variations among the  
155 four intraspecific groups made by warping along the significant PC axes. The  
156 cranial shape was represented by the wireframe connecting landmarks. Since  
157 sexual dimorphism in shape was detected only in PC1, 3D shape variation is  
158 represented by warping the female mean (PC1= -0.02: dashed line) to the male  
159 mean (PC1=0.02: solid line) (Fig.5). The male cranium, having positive PC1, is  
160 characterized by a lower neurocranium, supero-anteriorly positioned as well as  
161 vertically tilted nuchal crest, medio-laterally expanded zygomatic arch, relatively  
162 small orbit, infero-anteriorly protruded muzzle, and relatively developed face  
163 compared to the neurocranium as viewed globally.

164         Male subspecies shape variation was visualized by warping between the  
165 mean score coordinates of MFF males (PC1=0.01, PC3=0.01: solid line) from  
166 those of MFY males (PC1=0.02, PC3= -0.01: dashed line), since male subspecies  
167 variation was along the diagonal between PC1 and PC3 (Fig.6). Likewise,  
168 subspecies shape variation in females was visualized by warping mean MFF  
169 female scores (PC1= -0.03, PC2= 0.01: solid line) from the MFY female scores  
170 (PC1= -0.01, PC2= -0.02: dashed line) (Fig.7). In both sexes, MFY tended to have  
171 a lower neurocranium, relatively vertically tilted nuchal crest, stronger post-  
172 orbital constriction, relatively narrow orbit, and relatively developed muzzle  
173 compared to the calvarium as viewed globally. One subspecies shape differences,

174 that varied between males and females was the direction of muzzle development;  
175 the development was toward the supero-anterior direction in MFY males, while it  
176 was toward the inferior direction in MFY females.

177

## 178 **Discussion**

179 This study revealed that distinctive cranial size and three-dimensional  
180 shape variations exist both between the two subspecies and between the sexes of  
181 *Macaca fuscata*. The significant sexual (female<male) and subspecies  
182 (MFY<MFF) size differences we found are consistent with previous studies  
183 (Ikeda and Watanabe, 1966; Iwamoto, 1971; Hamada et al., 1996; Mouri and  
184 Nishimura 2002). The smaller cranium of MFY may be understood partly from  
185 the perspective of the insular effect (island rule). However, we cannot distinguish  
186 that effect from the effect of Bergman's rule along latitude, which has been  
187 confirmed in this specie (Hamada et al., 1996; Kuroda 1984). Differences in size  
188 might occur via ontogenetic processes involving modification of growth rate  
189 and/or growth duration. In size sexual dimorphism, these heterochronic process  
190 appear to play a key role, as Mouri (1994) found that the adolescent growth spurt  
191 ends later in males, which leads to extension of cranial the developmental period  
192 in *Macaca fuscata*. Although the contribution of developmental processes to the  
193 subspecies variation of size is still unknown, the relative head size of MFY is  
194 already smaller at birth (Hamada, 1994).

195 Apparent shape differences were also recognized here between  
196 subspecies and between sexes. Shape change along PC1, and thus sexual  
197 dimorphism in this study, followed the general sexual dimorphic trend in primates  
198 (e.g. Cardini and Elton, 2002b) and might possibly be related to the canine  
199 development, which is closely related to male-male competition for mating



200 (Plavcan, 2001). Other sexually dimorphic characters such as higher and broader  
201 occipital bun (for the insertion of nuchal muscles) and broader temporal fossa  
202 (accommodating temporal muscle passage) are related to the development of these  
203 muscles attached to the cranium. This shape sexual dimorphism is consistent with  
204 findings of a previous study obtained by using traditional morphometrics (Ikeda  
205 and Watanabe, 1966). The sexual shape variation in each subspecies appears to be  
206 correlated with size, so it is possible that shape variation can be largely explained  
207 by size difference i.e. ontogenetic scaling. To explore whether shape sexual  
208 dimorphism in the Japanese macaque is explained by ontogenetic scaling or not,  
209 however, ontogenetic data to compare ontogenetic trajectories of males and  
210 females would be necessary (e.g. Cobb and O’Higgins, 2007).

211         Among subspecies shape differences, the relatively vertically tilted  
212 nuchal crest, post-orbital constriction, and narrower orbit demonstrated in this  
213 study are the same as the differences reported by Ikeda and Watanabe (1966). The  
214 additional findings of the lower neurocranium and relatively developed muzzle in  
215 MFY found in this study had not been detected in any previous studies. This is  
216 because previous morphometric studies did not control for size effects and in  
217 reality compared subspecies form (size + shape) differences so that the larger  
218 muzzle in the dwarfed MFY might have been offset. It is also of interest that many  
219 parts of the characteristic traits of MFY, such as more protruding muzzle,  
220 relatively small neurocranium, postorbital constriction, and more vertically tilted  
221 nuchal plane are similar to features of the sexual dimorphism contributing to  
222 positive PC1 score for MFY in both sexes, resulting in the cranial shape in MFY  
223 appearing more “developed”, although MFY are smaller in size for both sexes.  
224 Kuroda (2002) also pointed out in his nonmetric study with adult crania that MFY  
225 is more hyperostetic than MFF. Yano et al. (2010) indicated that divergence of

226 ontogenetic trajectories occurs at a very early stage of fetal life, and neither pre-  
227 nor postnatal ontogenetic scaling nor heterochony alone can explain the  
228 generation of the subspecies shape differences. The early divergence of  
229 ontogenetic trajectories has also been suggested in human and non-human  
230 primates (Richtsmeier et al. 1993; Ponce de León and Zollikofer 2001;  
231 Ackermann and Krovitz 2002; Cobb and O’Higgins 2004). Although the actual  
232 ontogenetic patterns such as ontogenetic scaling and heterochrony involved in  
233 generating these subspecies differences cannot be extrapolated from the adult data  
234 in this study, shape variation is clearly not associated with size variation and size  
235 does not seem to play an important role in subspecies shape differences (Fig.4).  
236 To explore precisely when and how primates cranial shape differences are formed  
237 along ontogenetic process, comparative samples between closely related extant  
238 primates from fetus to adult will be needed.

239

#### 240 ACKNOWLEDGEMENTS

241 We wish to sincerely thank Kazumichi Katayama, Masato Nakatsukasa,  
242 Toshisada Nishida, and Daisuke Shimizu for their continuous guidance and  
243 support throughout the course of the present study. This study was supported by  
244 Japan Society for the Promotion of Science (JSPS) Grant-in-Aid for Scientific  
245 Research (B) 19370101 to NO and in part by the Global Center of Excellence  
246 Program A06 “Formation of a Strategic Base for Biodiversity and Evolutionary  
247 Research: from Genome to Ecosystem” of the Ministry of Education, Culture,  
248 Sports and Technology (MEXT), Japan.

249

250

251 REFERENCE

- 252 Ackermann RR, Krovitz GE (2002) Common patterns of facial ontogeny in the  
253 hominid lineage. *Anat Rec* 269:142–147
- 254 Cobb SN, O’Higgins P (2004) Hominins do not share a common postnatal facial  
255 ontogenetic shape trajectory. *J Exp Zool B Mol Dev Evol* 302B:302–321
- 256 Cardini A, Elton S (2008a) Variation in guenon skulls (I): Species divergence,  
257 ecological and genetic differences. *J Hum Evol* 54:615-37
- 258 Cardini A, Elton S (2008b) Variation in guenon skulls (II): Sexual dimorphism.  
259 *J Hum Evol* 54:638-47
- 260 Cobb SN, O’Higgins P (2004) Hominins do not share a common postnatal facial  
261 ontogenetic shape trajectory. *J Exp Zool B Mol Dev Evol* 302B:302–321
- 262 Cobb SN, O’Higgins P (2007) The ontogeny of sexual dimorphism in the facial  
263 skeleton of the African apes. *J Hum Evol* 53:176-190
- 264 Foster, J B (1964) Evolution of mammals on islands. *Nature* 202:234–235
- 265 Frost SR, Marcus LF, Bookstein FL, Reddy DP, Delson E (2003) Cranial  
266 allometry, phylogeography, and systematics of large-bodied papionins  
267 (primates: Cercopithecinae) inferred from geometric morphometric analysis  
268 of landmark data. *Anat Rec A* 275A:1048-72
- 269 Hamada Y (1994) Standard Growth patterns and variations in growth patterns of  
270 the Japanese Monkeys (*Macaca fuscata*) based on an analysis by the spline  
271 function method. *Anthropol. Sci.* 102 (Suppl.):57-76
- 272 Hamada Y, Watanabe T, Iwamoto M (1996) Morphological variations among  
273 local populations of Japanese Macaque (*Macaca fuscata*). In Shotake T and  
274 Wada K (eds) *Variations in the Asian Macaques*. Tokai University Press,  
275 Tokyo pp 97-115

- 276 Hayaishi S, Kawamoto Y (2006) Low genetic diversity and biased distribution of  
277 mitochondrial DNA haplotypes in the Japanese macaque (*Macaca fuscata*  
278 *yakui*) on Yakushima Island. *Primates* 47:158–164
- 279 Ikeda J, Watanabe T (1966) Morphological studies of *Macaca fuscata* III  
280 Craniometry. *Primates* 7:271-288
- 281 Iwamoto M (1971) Morphological studies of *Macaca fuscata* IV Somatometry.  
282 *Primates* 12:151-174
- 283 Kuroda N (1940) A monograph of the Japanese mammals exclusive of sirenia and  
284 cetacean. Sanseido Co, Tokyo, pp 311 (in Japanese)
- 285 Kuroda S (1984) Morphological characters and evolution of Yakushima  
286 macaques. *Monkey* 198/199:14-17 (in Japanese)
- 287 Kuroda S (2002) Microevolution of cranial bone morphology of *Macaca fuscata*  
288 in the postglacial period Non-metrological mutant characters of cranial bone  
289 of *Macaca fuscata*. *Asian Paleoprimatology* 2:115-125 (in Japanese)
- 290 Lomolino, M V (1985) Body size of mammals on islands: the island rule re-  
291 examined. *American Naturalist* 125:310–316
- 292 Mouri T, Nishimura T (2002) Craniometry of Adult Male Japanese Macaques  
293 from the Yakushima, Koshima and Kinkazan Islands. *Primate Research*  
294 18(1):43-47 (in Japanese, English summary)
- 295 Nozawa K, Shotake T, Minezawa M, Kawamoto Y, Hayasaka K, Kawamoto S,  
296 (1991) Population genetics of Japanese monkeys: III Ancestry and  
297 differentiation of local populations. *Primates* 32:411-435
- 298 O’Higgins P, Dryden I (1993) Sexual dimorphism in hominoids: further studies of  
299 craniofacial shape differences in Pan, Gorilla, and Pongo. *J Hum Evol* 24:  
300 183-205

- 301 O'Higgins P, Jones N (1998) Facial growth in *Cercocebus torquatus*: an  
302 application of three dimensional geometric morphometric techniques to the  
303 study of morphological variation. *J Anat* 193:251-272
- 304 O'Higgins P, Jones N (2006) Tools for statistical shape analysis. Hull York  
305 Medical School available from [http://www.york.ac.uk/re/fme/resources/  
306 software.htm](http://www.york.ac.uk/re/fme/resources/software.htm)
- 307 Pan R, Wei F, Li M (2003) Craniofacial variation of the Chinese macaques  
308 explored with Morphologika. *J Morph* 256:342-348
- 309 Plavcan (2001) Sexual Dimorphism in Primate Evolution. *Yearbook of Am J Phys*  
310 *Anthropol* 44:25–53
- 311 Ponce de León MS, Zollikofer CPE (2001) Neanderthal cranial ontogeny and its  
312 implications for late hominid diversity. *Nature* 412:534–538
- 313 Richtsmeier JT, Corner BD, Grausz HM, Cheverud JM, Danahey SE (1993) The  
314 role of postnatal growth pattern in the production of facial morphology. *Syst*  
315 *Biol* 42:307–330
- 316 Schaefer K, Mitteroecker P, Gunz P, Bernhard M, Bookstein F (2004)  
317 Craniofacial sexual dimorphism patterns and allometry among extant  
318 hominids. *Ann Anat* 186:471-478
- 319 Slice D (2005) Modern morphometrics in physical anthropology. Kluwer Acad  
320 Plenum, New York
- 321 Yano W, Egi N, Takano T, Ogihara N 2010 Prenatal ontogeny of subspecies  
322 variation in the craniofacial morphology of the Japanese macaque (*Macaca*  
323 *fuscata*). *Primates* 51:263-271
- 324 Zelditch M, Swiderski D, Sheets H, Fink W (2004) Geometric morphometrics for  
325 biologists: a primer. Elsevier, San Diego

326 Zollikofer CPE, Ponce de León MS (2002) Visualizing patterns of craniofacial  
327 shape variation in *Homo sapiens*. Proc R Soc Lond B 269:801-807  
328

**Table 1** Landmarks used in this study.

| No. | Definition                                                                                                 | Type |
|-----|------------------------------------------------------------------------------------------------------------|------|
| 1   | Bregma                                                                                                     | M    |
| 2   | Supraorbitale                                                                                              | M    |
| 3   | Maxillofrontale                                                                                            | B    |
| 4   | Most superior point on the inferior orbital rim of frontal bone                                            | B    |
| 5   | Frontomalare orbitale                                                                                      | B    |
| 6   | Sphenion                                                                                                   | B    |
| 7   | The ectocranial midline point on superior rim of anterior nasal aperture                                   | M    |
| 8   | Alare                                                                                                      | B    |
| 9   | Nasospinale                                                                                                | M    |
| 10  | Frontomalare temporale                                                                                     | B    |
| 11  | Zygoorbitale                                                                                               | B    |
| 12  | Most inferolateral point on inferior orbital rim                                                           | B    |
| 13  | Prosthion                                                                                                  | M    |
| 14  | Jugale                                                                                                     | B    |
| 15  | Zygomaxillare                                                                                              | B    |
| 16  | Most posterior point in the temporal process of the zygomatic bone                                         | B    |
| 17  | The point in the depth of the angle between the zygomatic process and the squama of temporal bone          | B    |
| 18  | Midpoint on the buccal alveolar rim of second molar                                                        | B    |
| 19  | Staphylion                                                                                                 | M    |
| 20  | Opisthion                                                                                                  | M    |
| 21  | Inion                                                                                                      | M    |
| 22  | The ectocranial midline point where inferior nuchal line crosses                                           | M    |
| 23  | Asterion                                                                                                   | B    |
| 24  | Auriculare                                                                                                 | B    |
| 25  | The cross-sectional point of median and transverse suture of palatine                                      | M    |
| 26  | Sphenobasion                                                                                               | M    |
| 27  | The most anterior point of the hypoglossal canal of lateral part of occipital bone                         | B    |
| 28  | Basion                                                                                                     | M    |
| 29  | Most lateral point on the lateral margin of the foramen magnum of lateral part of occipital bone           | B    |
| 30  | Most lateral point on the optic canal of lesser wing of sphenoid bone                                      | B    |
| 31  | Midpoint on the lateral side of the superior surface of the postsphenoid part of the body of sphenoid bone | B    |
| 32  | Most superolateral point on the greater wing of sphenoid bone                                              | B    |
| 33  | Most infero-lateral point on the greater wing of sphenoid bone                                             | B    |
| 34  | Most inferior point on the foramen rotundum of sphenoid bone                                               | B    |
| 35  | Nasion                                                                                                     | M    |

329 M = midsagittal B = bilateral

330

| Axis | Proportion(%) | Cumulative(%) |
|------|---------------|---------------|
| PC1  | 20.00         | 20.00         |
| PC2  | 11.70         | 31.70         |
| PC3  | 9.36          | 41.10         |
| PC4  | 6.17          | 47.30         |
| PC5  | 5.54          | 52.80         |
| PC6  | 5.04          | 57.80         |
| PC7  | 3.78          | 61.60         |
| PC8  | 3.42          | 65.00         |
| PC9  | 2.87          | 67.90         |
| PC10 | 2.79          | 70.70         |
| PC11 | 2.43          | 73.10         |
| PC12 | 2.05          | 75.20         |
| PC13 | 1.95          | 77.10         |
| PC14 | 1.86          | 79.00         |
| PC15 | 1.72          | 80.70         |



331 FIGURE LEGENDS

332 Fig.1 Landmarks and wireframe used in the present study. (A) Anterior view. (B) Lateral view. (C)  
333 Posterior view of sphenoid. (D) Inferior view.

334

335 Fig.2 Comparison of mean scores among the four intraspecific groups. (A) Centroid size (B) PC1  
336 (C) PC2 (D) PC3. Lines represent 95% confidence intervals.

337

338 Fig.3 Result of principal component analysis. (A) PC1 vs. PC2. (B) PC1 vs. PC3

339

340 Fig.4 Relationships of size (CS) and PC1.

341

342 Fig.5 Sexual dimorphic shape difference in MFY. Solid lines, Male (PC1=0.02); Dashed lines,  
343 Female (PC1= -0.02). Shape variations are visualized with 3D deformation of the wireframe  
344 connecting landmarks

345

346 Fig.6 Subspecies shape differences in males. Solid lines, MFF males (PC1=0.01, PC3=0.01);  
347 Dashed lines, MFY males (PC1 = 0.02, PC3=-0.01).

348

349 Fig.7 Subspecies shape differences in females. Solid lines, MFF females (PC1 = -0.03, PC2=0.01);  
350 Dashed lines, MFY females (PC1= -0.01, PC2= -0.02).

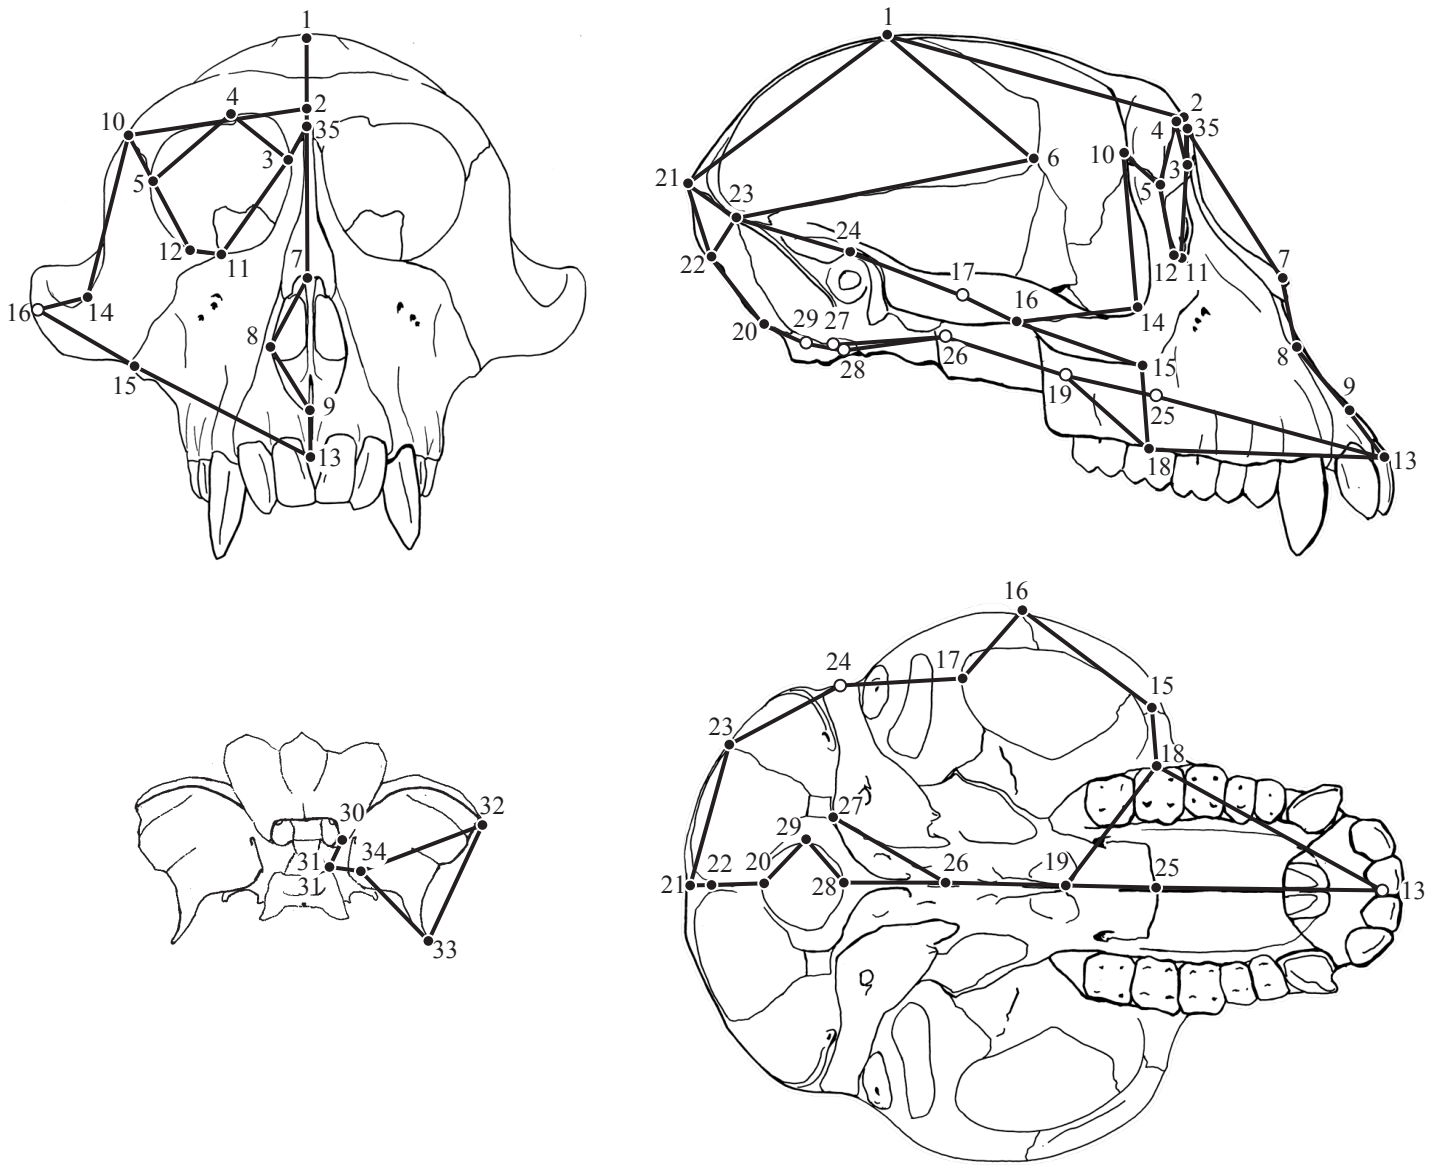

Figure 1

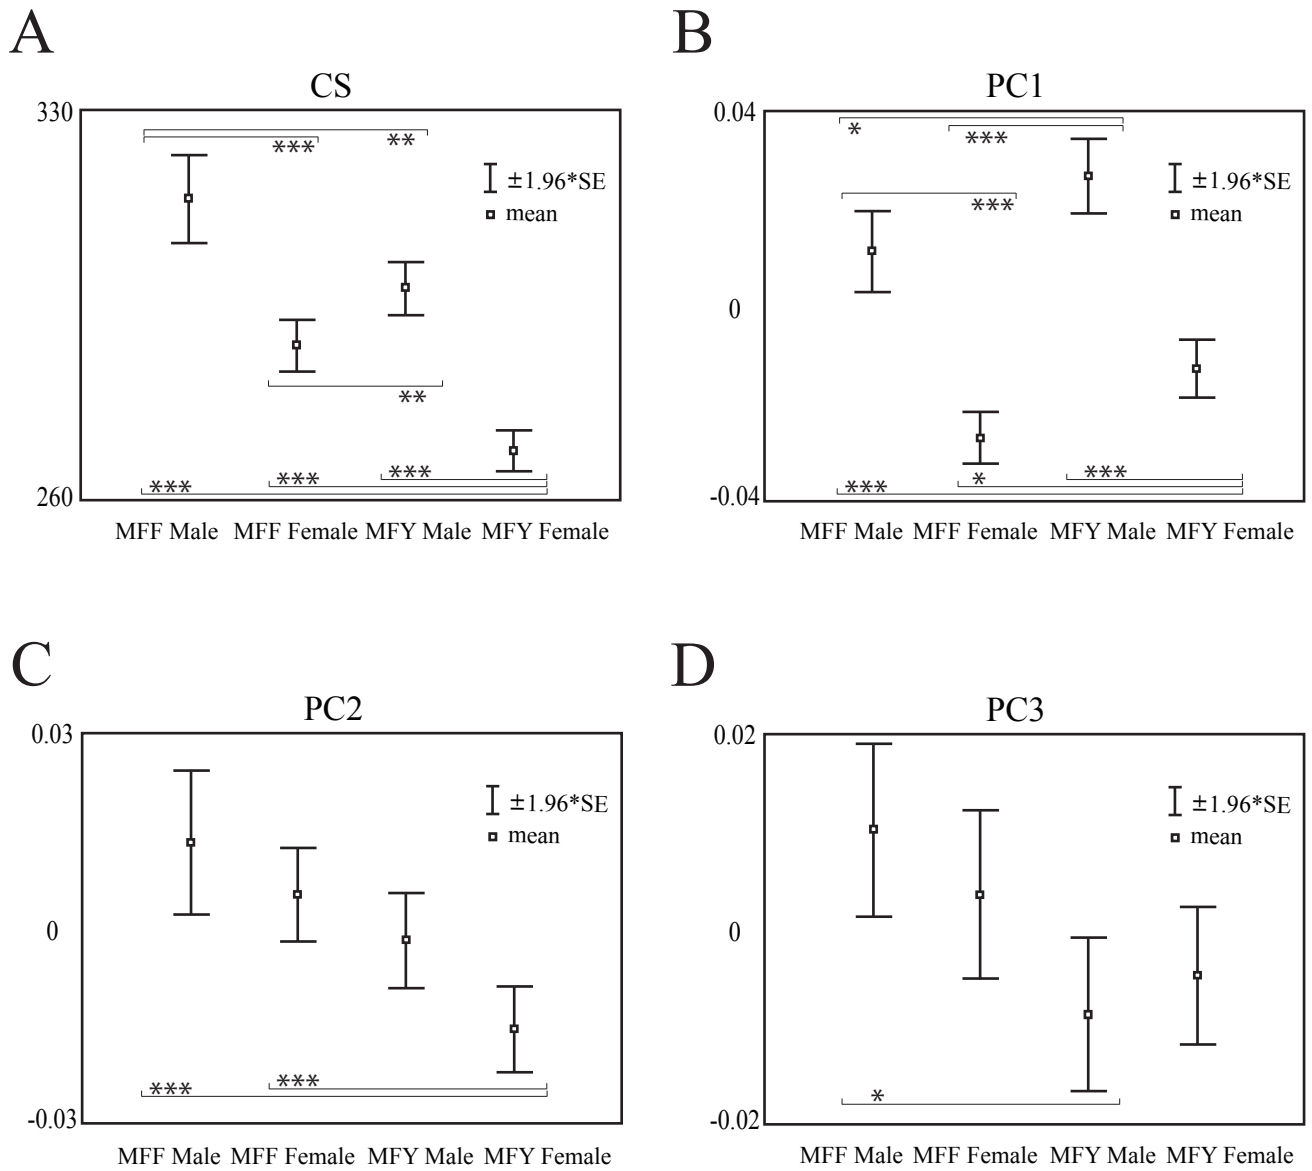

Figure 2

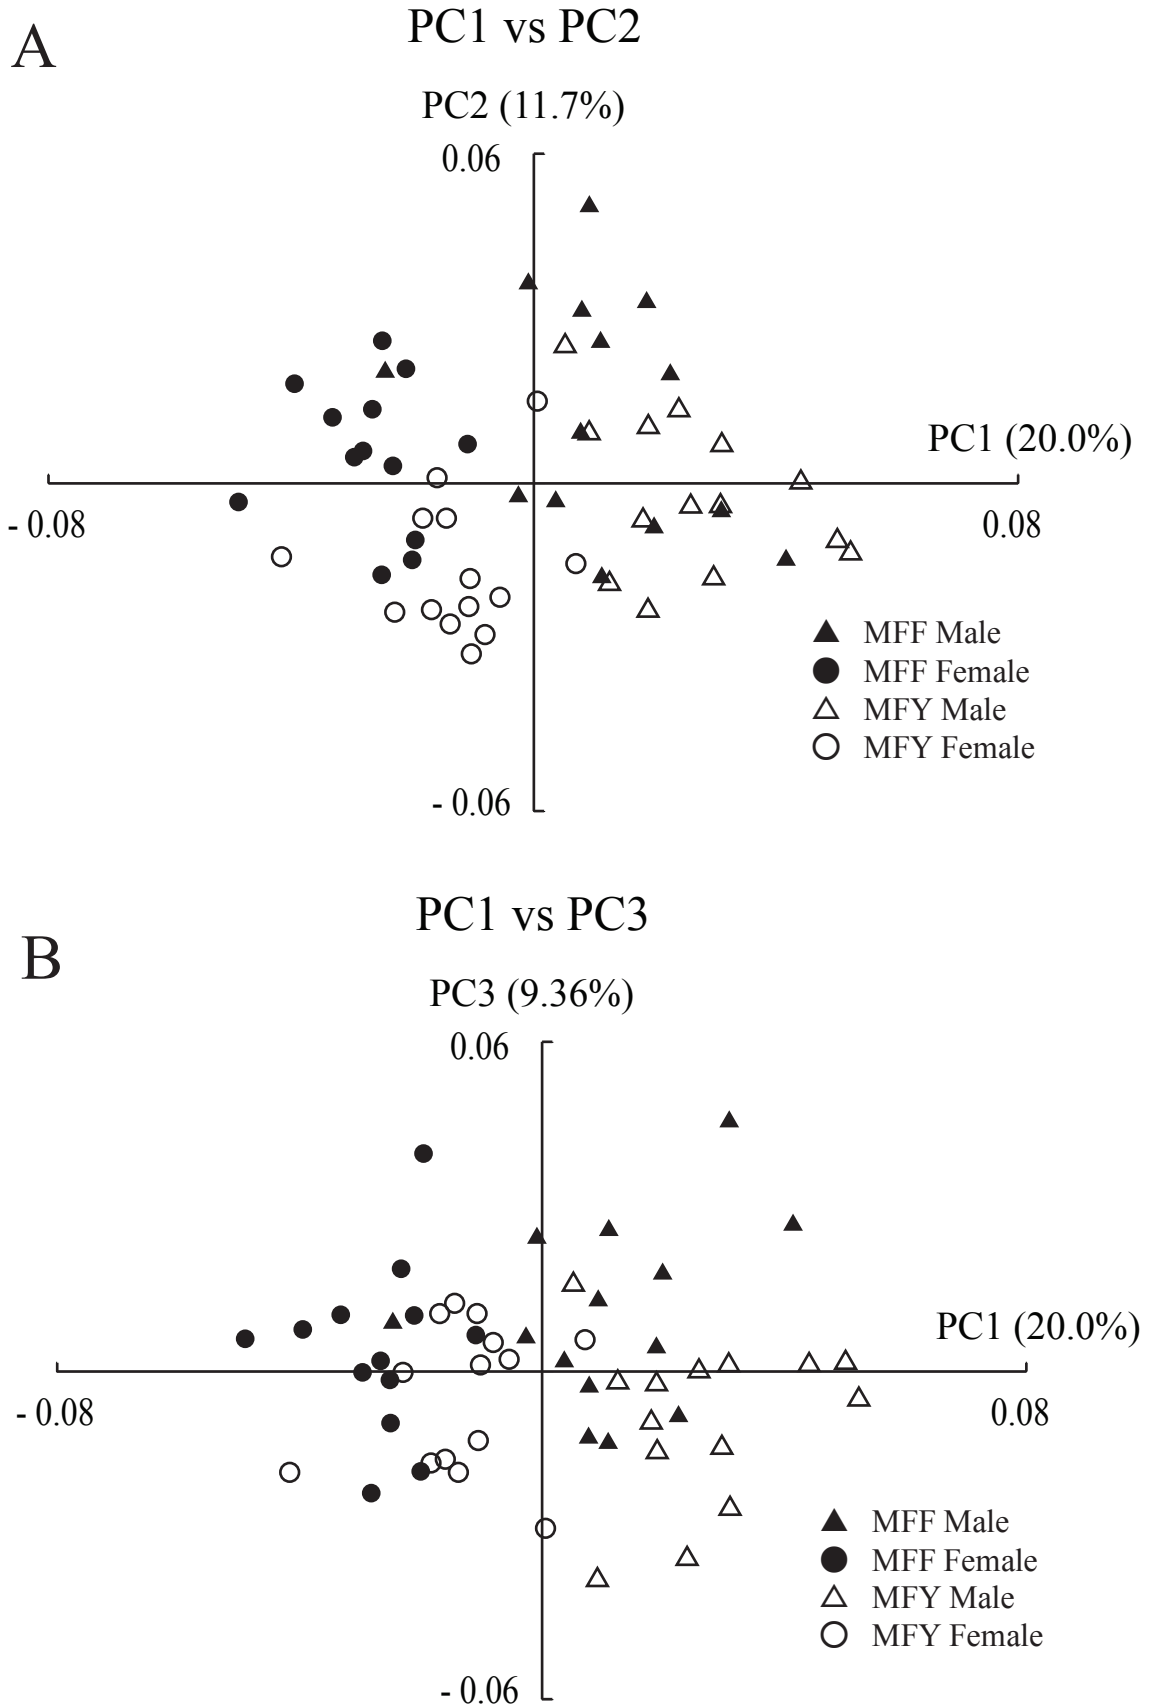

Figure 3

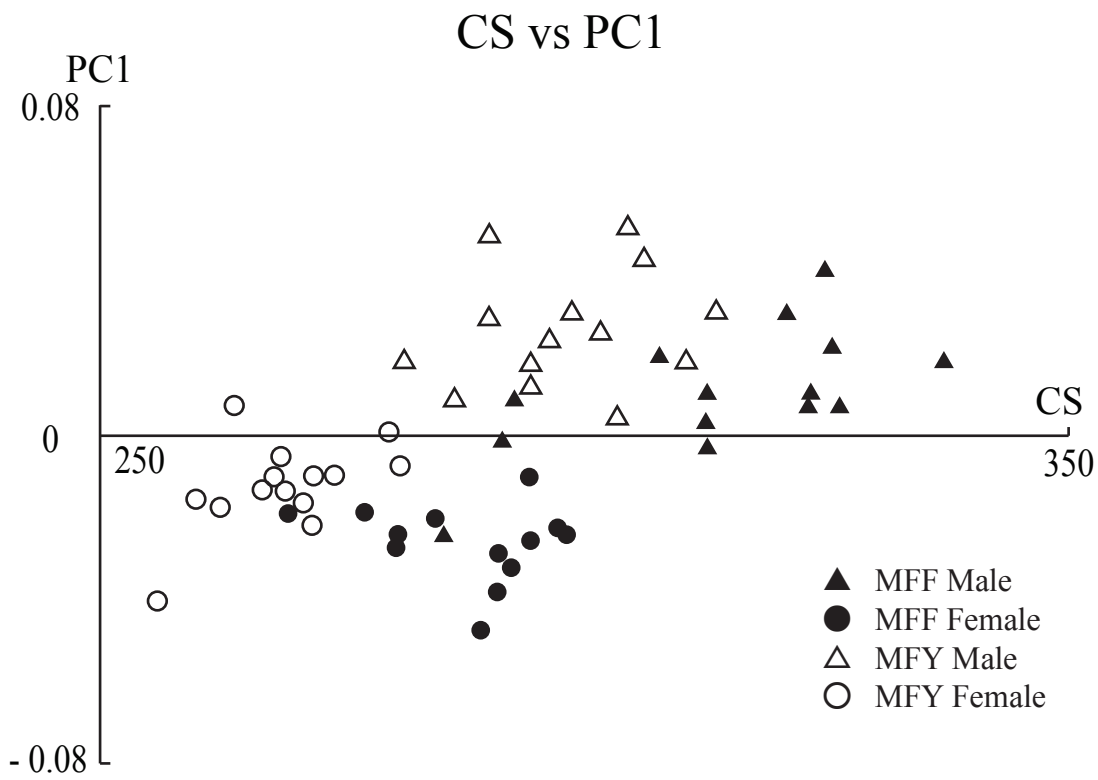

Figure 4

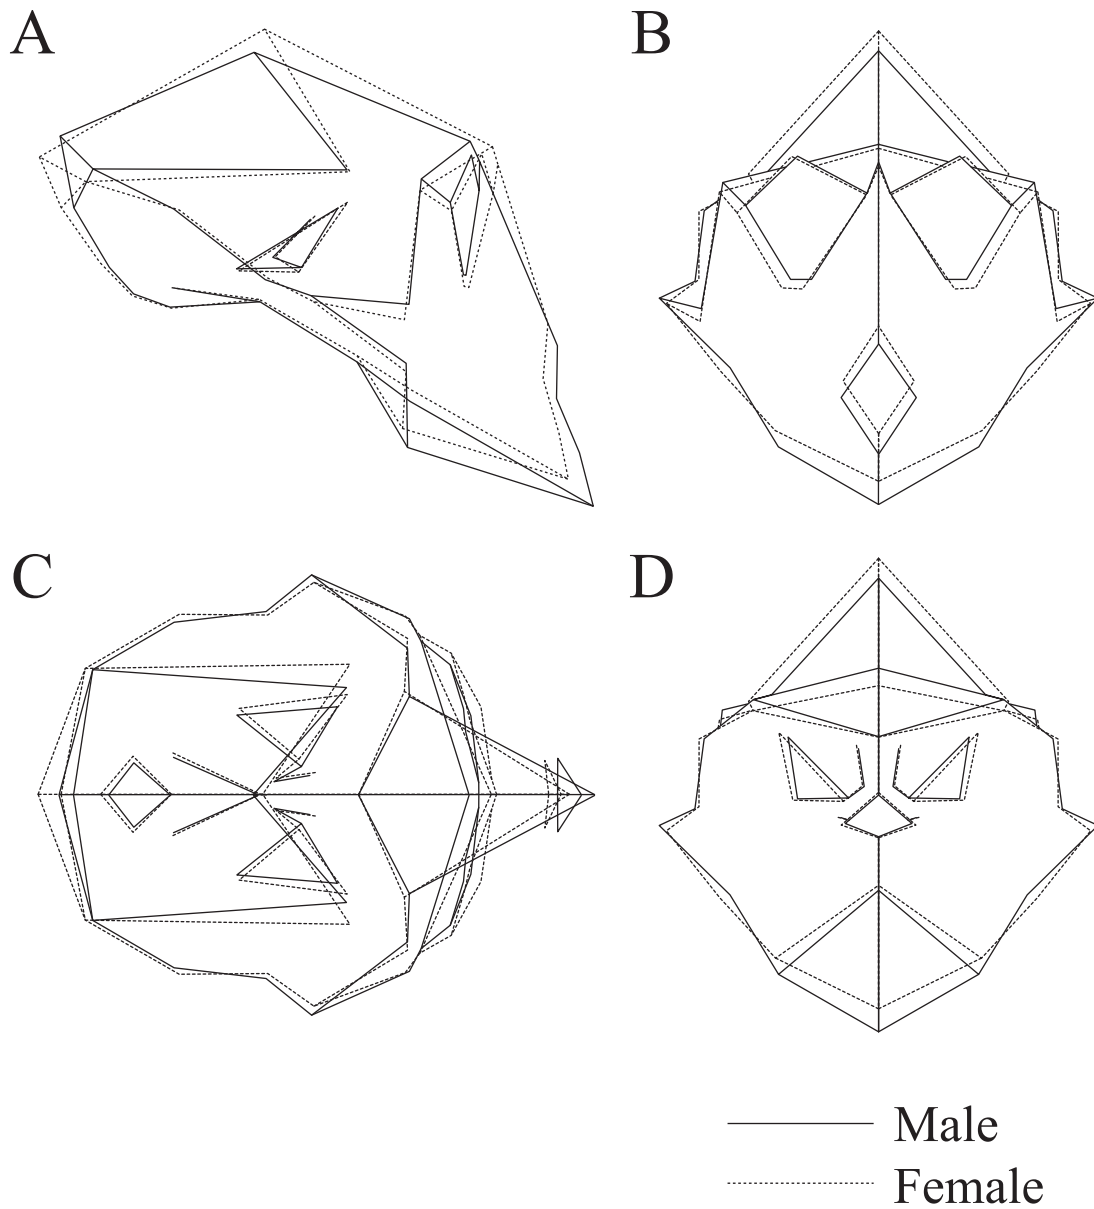

Figure 5

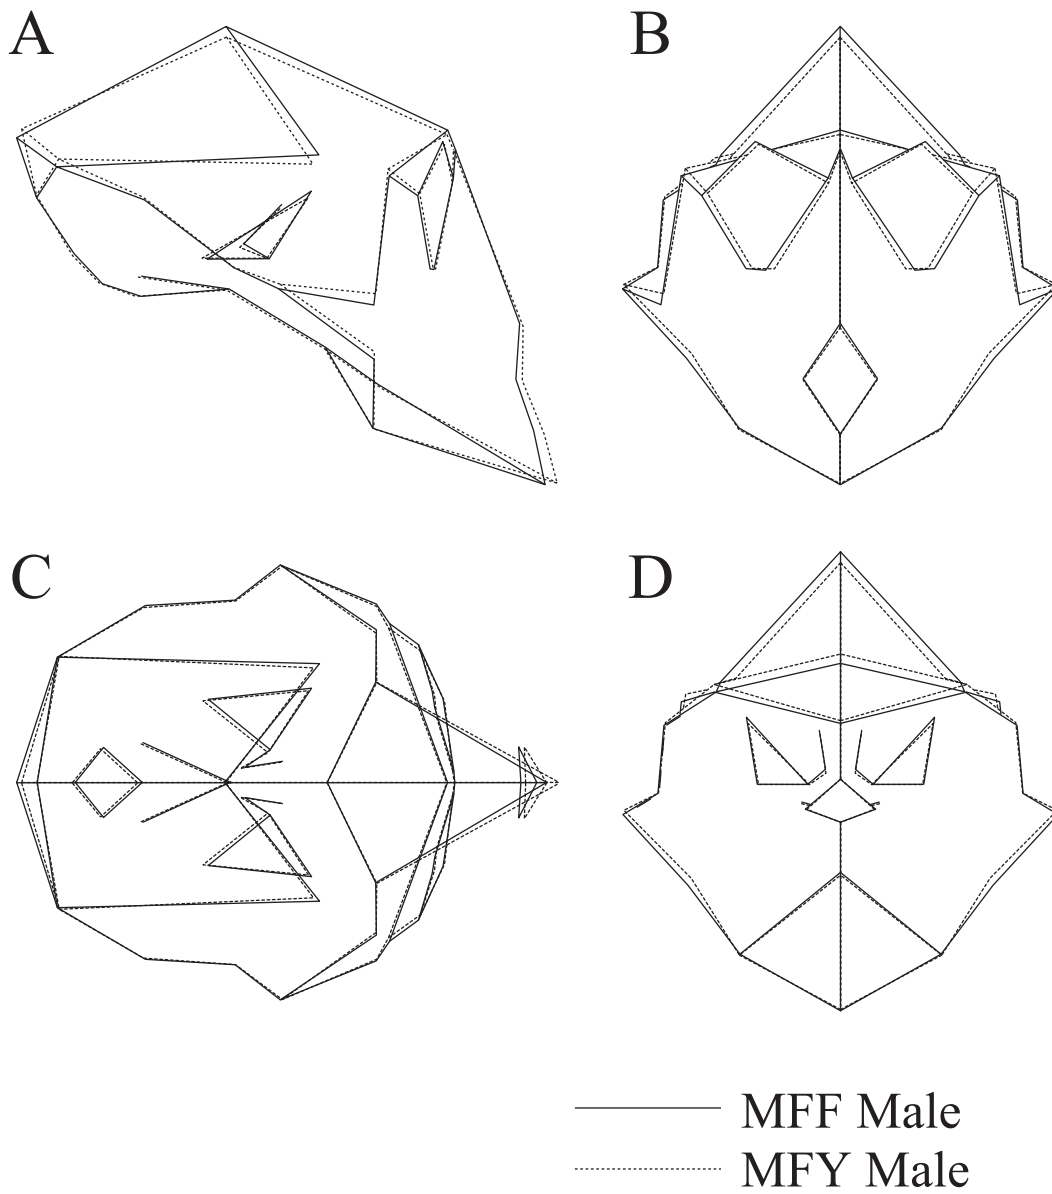

Figure 6

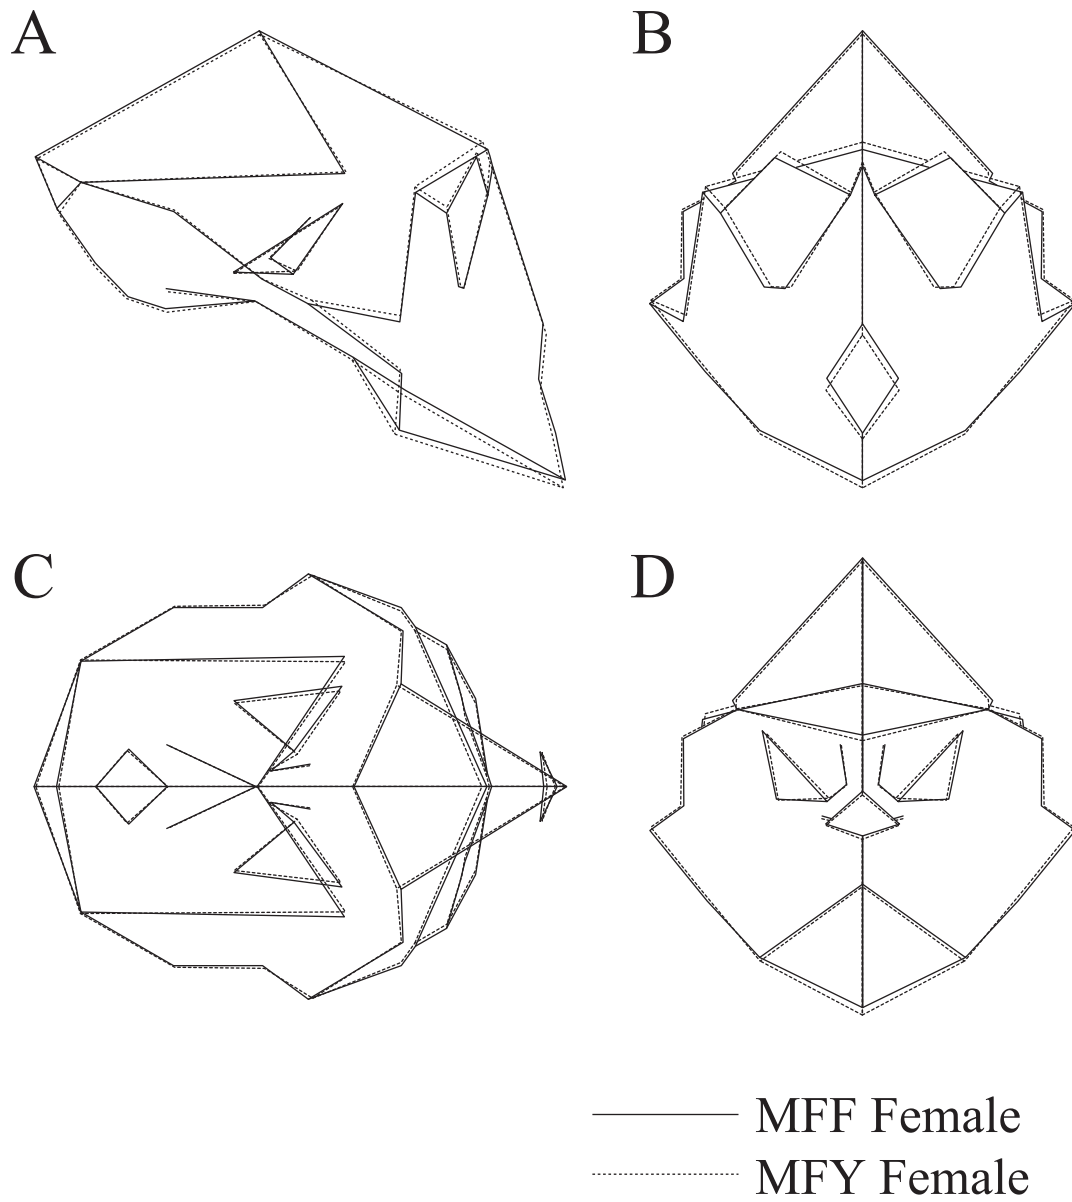

Figure 7
